# Supplementary material for: The Occurrence of Biogenic Amines and Determination of Biogenic Amine-Producing Lactic Acid Bacteria in Kkakdugi and Chonggak Kimchi
Source: MDPI journal article supplement (doi:10.3390/foods8020073), 2019-02-14
Supplement: s1 [file s1]

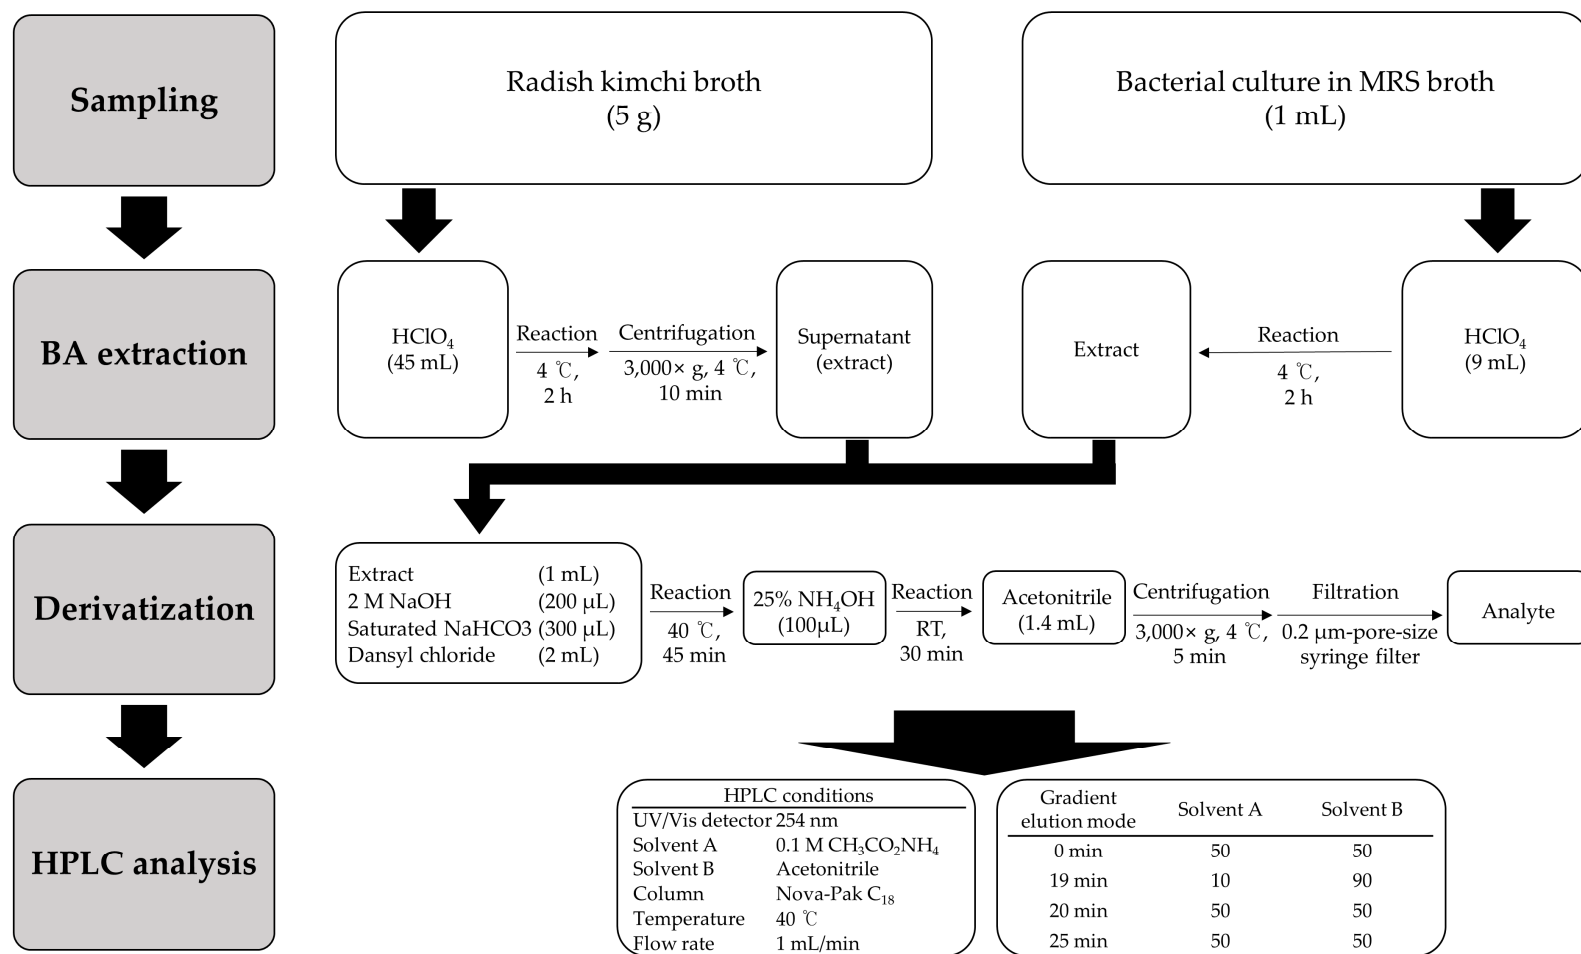

**Figure S1.** Scheme of procedure for BA analysis.
